up for the lack of footnotes in the text. Curiously absent, however, is Sergio Bagú, *Argentina en el mundo* (1961).

*Esau and Jacob*. By MACHADO DE ASSIS. Translated and with an introduction by HELEN CALDWELL. Berkeley, 1965. University of California Press. Pp. 287. \$5.00.

This novel will interest the social more than the political historian, for the echoes of governmental upsets and occasional gun volleys at the turn of the ninth decade fall upon the reader's senses lightly. "I favored the churches, no friends asked for the use of the police but what I granted it," one inept politician sighs. "I brought twenty persons to trial, others went to jail without trial. Was I supposed to *hang* people?" (p. 74). His daughter's affections are sought by the twin sons of an imperial banker-baron. One favors the monarchy, the other the republic. As it must turn out in Machado's Brazil, order does not preclude progress, nor does progress order.

The infants' mother learns of their destiny for greatness from a *cabocla* fortune teller. Disdaining "childish beliefs," (p. 44) the father turns to and gets the same message from a spiritualistic medium ("put a wand in his hand and you would have a sorcerer") in a finely ironic scene (p. 37). Both baroness and baron, then, are conventional *sobrado* types—eclectic, church-going bourgeois of the last quarter of the nineteenth century. The climax of the story of the damsel and the twins, told by a world-weary ex-diplomat, comes not when Pedro and Paulo successfully stand for election as deputies in opposing parties but rather when Flora (Brazil?) dies, incapable to the last of choosing between them.

Very well translated, *Esau and Jacob* is chock-full of *carioca* culture,

gentle satire, social vignettes, and Machadian tag lines.

DONALD WARREN, JR.  
New York, N. Y.

## OTHER BOOKS RECEIVED

*Narrative of Voyages and Excursions on the East Coast and in the Interior of Central America*. By ORLANDO W. ROBERTS. Edited by HUGH CRAGGS. Gainesville, 1965. University of Florida Press. Illustrations. Appendix. Index. Pp. 302, 9.

*Waikna; or Adventures on the Mosquito Shore*. By EPHRAIM GEORGE SQUIER. Edited by DANIEL E. ALLEGER. Gainesville, 1965. University of Florida Press. Illustrations. Appendix. Index. Pp. 366. \$9.00.

These are facsimile reproductions of travel books originally published in 1827 and 1855 respectively.

*A Century of Latin American Thought*. By W. REX CRAWFORD. New York, 1966. Frederick A. Praeger. Paperback U-606. Notes. Bibliography. Index. Pp. 322. \$2.50.

*Baroque Times in Old Mexico*. By IRVING A. LEONARD. Ann Arbor, 1966. University of Michigan Press. Ann Arbor Paperbacks AA110. Notes. Bibliography. Index. Pp. xi, 260. \$1.95.

*The Portable Prescott; the Rise and Decline of the Spanish Empire*. Edited by IRWIN R. BLACKER. New York, 1966. The Viking Press. Viking Portable Library P66. Bibliography. Pp. vii, 568. \$1.85.

*Imperial Spain, 1469-1716*. By J. H. ELLIOTT. New York, 1966. New American Library. Mentor Book MQ664. Illustrations. Bibliography. Index. Pp. viii, 406. \$95.

These works are now reprinted in paperback form without any changes from earlier editions. They were reviewed in *HAHR* in November 1944, August 1960, August 1964, and May 1965 respectively.
